# Supplementary material for: Enzyme-less nanopore detection of post-translational modifications within long polypeptides
Source: PubMed Central journal article supplement (PMC10656283; doi:10.1038/s41565-023-01462-8), 2023-07-27
Supplement: 41565_2023_1462_MOESM1_ESM.pdf [file 41565_2023_1462_MOESM1_ESM.pdf]

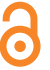

---

# Enzyme-less nanopore detection of post-translational modifications within long polypeptides

---

In the format provided by the authors and unedited

---

## Table of Contents:

|                                                                                                                                                                                                                              |           |
|------------------------------------------------------------------------------------------------------------------------------------------------------------------------------------------------------------------------------|-----------|
| <b>Table S1</b> Sequences of the thioredoxin-linker concatemers .....                                                                                                                                                        | <b>2</b>  |
| <b>Table S2</b> Percentage residual currents ( $I_{res\%}$ ) for the three levels of repeating feature A recorded during C-terminus first concatemer translocation .....                                                     | <b>4</b>  |
| <b>Table S3</b> Frequency of C terminus-first or N terminus-first translocation events recorded with Trx-linker concatemers .....                                                                                            | <b>5</b>  |
| <b>Table S4</b> Percentages of concatemer translocation events with N numbers of feature A repeats .....                                                                                                                     | <b>6</b>  |
| <b>Table S5</b> Mean dwell times ( $\langle\tau\rangle$ ) for the three levels of repeating feature A (A1, A2, A3) recorded during the C-terminus first translocation of Trx-linker octamers through a single nanopore ..... | <b>7</b>  |
| <b>Table S6</b> Percentage residual current ( $I_{res\%}$ ) and root-mean-square noise ( $I_{RMS}$ ) characteristics of individual modifications on Trx-linker nonamers .....                                                | <b>8</b>  |
| <b>Fig. S1</b> LC-MS characterization of Trx-linker concatemers .....                                                                                                                                                        | <b>9</b>  |
| <b>Fig. S2</b> Electroosmosis-driven translocation of Trx-linker octamers through a nanopore .....                                                                                                                           | <b>10</b> |
| <b>Fig. S3</b> LC-MS characterization of Trx-linker nonamers .....                                                                                                                                                           | <b>11</b> |
| <b>Fig. S4</b> Identification and positional discrimination of PTMs in protein concatemers translocated by electroosmotic flow through a nanopore .....                                                                      | <b>12</b> |
| <b>Fig. S5</b> Identification of PTMs in a mixture of two concatemers .....                                                                                                                                                  | <b>13</b> |
| <b>Fig. S6</b> Positions of modification sites during translocation through an $\alpha$ HL pore .....                                                                                                                        | <b>14</b> |
| <b>References</b> .....                                                                                                                                                                                                      | <b>15</b> |

**Table S1 Sequences of the thioredoxin-linker concatemers**

|                                                                                                                                                                                                                                                                                                                                                                                                                                                                                                                                                                                                                                                                                                                                                                                                                                                                                                                                                                                                                                                                                                                                                                                                                                                                                                                                                                                                                                                                                         |
|-----------------------------------------------------------------------------------------------------------------------------------------------------------------------------------------------------------------------------------------------------------------------------------------------------------------------------------------------------------------------------------------------------------------------------------------------------------------------------------------------------------------------------------------------------------------------------------------------------------------------------------------------------------------------------------------------------------------------------------------------------------------------------------------------------------------------------------------------------------------------------------------------------------------------------------------------------------------------------------------------------------------------------------------------------------------------------------------------------------------------------------------------------------------------------------------------------------------------------------------------------------------------------------------------------------------------------------------------------------------------------------------------------------------------------------------------------------------------------------------|
| <p><b>Dimer (Trx-linker)<sub>2</sub></b></p> <p>CGSDKIIHLTDDSFDTDVLKADGAILVDFWAEWSGSPKMIAPILDEIADEYQGKLTVAKLNIDQNPGTAPKYGIRGIPTLLLFKNGEVAATKVGALSKGQLKEFLDANLAGSAGSAGSAGSAGSAGSAGSAGSAGSAGSAGRS</p> <p>IIHLTDDSFDTDVLKADGAILVDFWAEWSGSPKMIAPILDEIADEYQGKLTVAKLNIDQNPGTAPKYGIRGIP<br/>         TLLLFKNGEVAATKVGALSKGQLKEFLDANLAGSAGSAGSAGSAGSAGSAGSAGSAGSAGSAGRS</p>                                                                                                                                                                                                                                                                                                                                                                                                                                                                                                                                                                                                                                                                                                                                                                                                                                                                                                                                                                                                                                                                                                                     |
| <p><b>Tetramer (Trx-linker)<sub>4</sub></b></p> <p>CGSDKIIHLTDDSFDTDVLKADGAILVDFWAEWSGSPKMIAPILDEIADEYQGKLTVAKLNIDQNPGTAPKYGIRGIPTLLLFKNGEVAATKVGALSKGQLKEFLDANLAGSAGSAGSAGSAGSAGSAGSAGSAGSAGSAGSAGRS</p> <p>IIHLTDDSFDTDVLKADGAILVDFWAEWSGSPKMIAPILDEIADEYQGKLTVAKLNIDQNPGTAPKYGIRGIP<br/>         TLLLFKNGEVAATKVGALSKGQLKEFLDANLAGSAGSAGSAGSAGSAGSAGSAGSAGSAGSAGSAGRS<br/>         SDKIIHLTDDSFDT<br/>         DSFDTDVLKADGAILVDFWAEWSGSPKMIAPILDEIADEYQGKLTVAKLNIDQNPGTAPKYGIRGIPTLLLFK<br/>         NGEVAATKVGALSKGQLKEFLDANLAGSAGSAGSAGSAGSAGSAGSAGSAGSAGSAGSAGRS<br/>         SDKIIHLTDDSFDT<br/>         DVLKADGAILVDFWAEWSGSPKMIAPILDEIADEYQGKLTVAKLNIDQNPGTAPKYGIRGIPTLLLFKNGEVA<br/>         ATKVGALSKGQLKEFLDANLAGSAGSAGSAGSAGSAGSAGSAGSAGSAGSAGSAGRS</p>                                                                                                                                                                                                                                                                                                                                                                                                                                                                                                                                                                                                                                                                                                                   |
| <p><b>Hexamer (Trx-linker)<sub>6</sub></b></p> <p>CGSDKIIHLTDDSFDTDVLKADGAILVDFWAEWSGSPKMIAPILDEIADEYQGKLTVAKLNIDQNPGTAPKYGIRGIPTLLLFKNGEVAATKVGALSKGQLKEFLDANLAGSAGSAGSAGSAGSAGSAGSAGSAGSAGSAGSAGRS</p> <p>IIHLTDDSFDTDVLKADGAILVDFWAEWSGSPKMIAPILDEIADEYQGKLTVAKLNIDQNPGTAPKYGIRGIP<br/>         TLLLFKNGEVAATKVGALSKGQLKEFLDANLAGSAGSAGSAGSAGSAGSAGSAGSAGSAGSAGSAGRS<br/>         SDKIIHLTDDSFDT<br/>         DSFDTDVLKADGAILVDFWAEWSGSPKMIAPILDEIADEYQGKLTVAKLNIDQNPGTAPKYGIRGIPTLLLFK<br/>         NGEVAATKVGALSKGQLKEFLDANLAGSAGSAGSAGSAGSAGSAGSAGSAGSAGSAGSAGRS<br/>         SDKIIHLTDDSFDT<br/>         DVLKADGAILVDFWAEWSGSPKMIAPILDEIADEYQGKLTVAKLNIDQNPGTAPKYGIRGIPTLLLFKNGEVA<br/>         ATKVGALSKGQLKEFLDANLAGSAGSAGSAGSAGSAGSAGSAGSAGSAGSAGSAGRS<br/>         SDKIIHLTDDSFDTDVLKAD<br/>         GAILVDFWAEWSGSPKMIAPILDEIADEYQGKLTVAKLNIDQNPGTAPKYGIRGIPTLLLFKNGEVAATKVG<br/>         ALSKGQLKEFLDANLAGSAGSAGSAGSAGSAGSAGSAGSAGSAGSAGSAGRS<br/>         SDKIIHLTDDSFDTDVLKADGAILV<br/>         DFWAEWSGSPKMIAPILDEIADEYQGKLTVAKLNIDQNPGTAPKYGIRGIPTLLLFKNGEVAATKVGALSKG<br/>         QLKEFLDANLAGSAGSAGSAGSAGSAGSAGSAGSAGSAGSAGSAGRS</p>                                                                                                                                                                                                                                                                                                                                |
| <p><b>Octamer (Trx-linker)<sub>8</sub></b></p> <p>CGSDKIIHLTDDSFDTDVLKADGAILVDFWAEWSGSPKMIAPILDEIADEYQGKLTVAKLNIDQNPGTAPKYGIRGIPTLLLFKNGEVAATKVGALSKGQLKEFLDANLAGSAGSAGSAGSAGSAGSAGSAGSAGSAGSAGSAGRS</p> <p>IIHLTDDSFDTDVLKADGAILVDFWAEWSGSPKMIAPILDEIADEYQGKLTVAKLNIDQNPGTAPKYGIRGIP<br/>         TLLLFKNGEVAATKVGALSKGQLKEFLDANLAGSAGSAGSAGSAGSAGSAGSAGSAGSAGSAGSAGRS<br/>         SDKIIHLTDDSFDT<br/>         DSFDTDVLKADGAILVDFWAEWSGSPKMIAPILDEIADEYQGKLTVAKLNIDQNPGTAPKYGIRGIPTLLLFK<br/>         NGEVAATKVGALSKGQLKEFLDANLAGSAGSAGSAGSAGSAGSAGSAGSAGSAGSAGSAGRS<br/>         SDKIIHLTDDSFDT<br/>         DVLKADGAILVDFWAEWSGSPKMIAPILDEIADEYQGKLTVAKLNIDQNPGTAPKYGIRGIPTLLLFKNGEVA<br/>         ATKVGALSKGQLKEFLDANLAGSAGSAGSAGSAGSAGSAGSAGSAGSAGSAGSAGRS<br/>         SDKIIHLTDDSFDTDVLKAD<br/>         GAILVDFWAEWSGSPKMIAPILDEIADEYQGKLTVAKLNIDQNPGTAPKYGIRGIPTLLLFKNGEVAATKVG<br/>         ALSKGQLKEFLDANLAGSAGSAGSAGSAGSAGSAGSAGSAGSAGSAGSAGRS<br/>         SDKIIHLTDDSFDTDVLKADGAILV<br/>         DFWAEWSGSPKMIAPILDEIADEYQGKLTVAKLNIDQNPGTAPKYGIRGIPTLLLFKNGEVAATKVGALSKG<br/>         QLKEFLDANLAGSAGSAGSAGSAGSAGSAGSAGSAGSAGSAGSAGRS<br/>         SDKIIHLTDDSFDTDVLKADGAILVDFWAE<br/>         WSGSPKMIAPILDEIADEYQGKLTVAKLNIDQNPGTAPKYGIRGIPTLLLFKNGEVAATKVGALSKGQLKEFL<br/>         DANLAGSAGSAGSAGSAGSAGSAGSAGSAGSAGSAGRS<br/>         SDKIIHLTDDSFDTDVLKADGAILVDFWAEWSGPS<br/>         KMIAPILDEIADEYQGKLTVAKLNIDQNPGTAPKYGIRGIPTLLLFKNGEVAATKVGALSKGQLKEFLDANLA</p> |
| <p><b>Blue:</b> Trx; <b>Yellow:</b> linker; <b>Pink:</b> N-terminal cysteine-glycine; <b>White:</b> restriction enzyme site.</p>                                                                                                                                                                                                                                                                                                                                                                                                                                                                                                                                                                                                                                                                                                                                                                                                                                                                                                                                                                                                                                                                                                                                                                                                                                                                                                                                                        |

**Nonamer (Trx-linker)<sub>4</sub>(Trx-linker-24S/26C)(Trx-linker)<sub>4</sub>**

SDKIIHLTDDSFDTDLKADGAILVDFWAEWSPSKMIAPILDEIADEYQGKLTVAKLNIDQNPGTAPKYGIR  
GIPTLLLFKNGEVAATKVGALSKGQLKEFLDANLAGSAGSAGSAGSAGSAGSAGSAGSAGSAGSAGRSDKIIHL  
TDDSFDTDLKADGAILVDFWAEWSPSKMIAPILDEIADEYQGKLTVAKLNIDQNPGTAPKYGIRGIPTLLL  
FKNGEVAATKVGALSKGQLKEFLDANLAGSAGSAGSAGSAGSAGSAGSAGSAGSAGSAGRSDKIIHLTDDSF  
DTDLKADGAILVDFWAEWSPSKMIAPILDEIADEYQGKLTVAKLNIDQNPGTAPKYGIRGIPTLLLFKNGE  
VAATKVGALSKGQLKEFLDANLAGSAGSAGSAGSAGSAGSAGSAGSAGSAGSAGRSDKIIHLTDDSFDTDLK  
ADGAILVDFWAEWSPSKMIAPILDEIADEYQGKLTVAKLNIDQNPGTAPKYGIRGIPTLLLFKNGEVAATKV  
GALSKGQLKEFLDANLAGSAGSAGSAGSAGSAGSAGSAGSAGSAGSAGRSGTSDKIIHLTDDSFDTDLKAD  
GAILVDFWAEWSPSKMIAPILDEIADEYQGKLTVAKLNIDQNPGTAPKYGIRGIPTLLLFKNGEVAATKVG  
ALSKGQLKEFLDANLAGSAGSAGSAGSAGSAGSAGSRRASACAGSAGSAGRSPRRSDKIIHLTDDSFDT  
DLKADGAILVDFWAEWSPSKMIAPILDEIADEYQGKLTVAKLNIDQNPGTAPKYGIRGIPTLLLFKNGEVA  
ATKVGALSKGQLKEFLDANLAGSAGSAGSAGSAGSAGSAGSAGSAGSAGSAGRSDKIIHLTDDSFDTDLKAD  
GAILVDFWAEWSPSKMIAPILDEIADEYQGKLTVAKLNIDQNPGTAPKYGIRGIPTLLLFKNGEVAATKVG  
ALSKGQLKEFLDANLAGSAGSAGSAGSAGSAGSAGSAGSAGSAGRSDKIIHLTDDSFDTDLKADGAILV  
DFWAEWSPSKMIAPILDEIADEYQGKLTVAKLNIDQNPGTAPKYGIRGIPTLLLFKNGEVAATKVGALSKG  
QLKEFLDANLAGSAGSAGSAGSAGSAGSAGSAGSAGSAGRSDKIIHLTDDSFDTDLKADGAILVDFWAE  
WSPSKMIAPILDEIADEYQGKLTVAKLNIDQNPGTAPKYGIRGIPTLLLFKNGEVAATKVGALSKGQLKEFL  
DANLAGSAGSAGSAGSAGSAGSAGSAGSAGSAGS

**Nonamer (Trx-linker)<sub>4</sub>(Trx-linker-14S/16C)(Trx-linker)<sub>4</sub>**

SDKIIHLTDDSFDTDLKADGAILVDFWAEWSPSKMIAPILDEIADEYQGKLTVAKLNIDQNPGTAPKYGIR  
GIPTLLLFKNGEVAATKVGALSKGQLKEFLDANLAGSAGSAGSAGSAGSAGSAGSAGSAGSAGSAGRSDKIIHL  
TDDSFDTDLKADGAILVDFWAEWSPSKMIAPILDEIADEYQGKLTVAKLNIDQNPGTAPKYGIRGIPTLLL  
FKNGEVAATKVGALSKGQLKEFLDANLAGSAGSAGSAGSAGSAGSAGSAGSAGSAGSAGRSDKIIHLTDDSF  
DTDLKADGAILVDFWAEWSPSKMIAPILDEIADEYQGKLTVAKLNIDQNPGTAPKYGIRGIPTLLLFKNGE  
VAATKVGALSKGQLKEFLDANLAGSAGSAGSAGSAGSAGSAGSAGSAGSAGSAGRSDKIIHLTDDSFDTDLK  
ADGAILVDFWAEWSPSKMIAPILDEIADEYQGKLTVAKLNIDQNPGTAPKYGIRGIPTLLLFKNGEVAATKV  
GALSKGQLKEFLDANLAGSAGSAGSAGSAGSAGSAGSAGSAGSAGRSGTSDKIIHLTDDSFDTDLKAD  
GAILVDFWAEWSPSKMIAPILDEIADEYQGKLTVAKLNIDQNPGTAPKYGIRGIPTLLLFKNGEVAATKVG  
ALSKGQLKEFLDANLAGSAGSAGSAGRRASACAGSAGSAGSAGSAGSAGRSPRRSDKIIHLTDDSFDT  
DLKADGAILVDFWAEWSPSKMIAPILDEIADEYQGKLTVAKLNIDQNPGTAPKYGIRGIPTLLLFKNGEVA  
ATKVGALSKGQLKEFLDANLAGSAGSAGSAGSAGSAGSAGSAGSAGSAGSAGRSDKIIHLTDDSFDTDLKAD  
GAILVDFWAEWSPSKMIAPILDEIADEYQGKLTVAKLNIDQNPGTAPKYGIRGIPTLLLFKNGEVAATKVG  
ALSKGQLKEFLDANLAGSAGSAGSAGSAGSAGSAGSAGSAGSAGRSDKIIHLTDDSFDTDLKADGAILV  
DFWAEWSPSKMIAPILDEIADEYQGKLTVAKLNIDQNPGTAPKYGIRGIPTLLLFKNGEVAATKVGALSKG  
QLKEFLDANLAGSAGSAGSAGSAGSAGSAGSAGSAGSAGRSDKIIHLTDDSFDTDLKADGAILVDFWAE  
WSPSKMIAPILDEIADEYQGKLTVAKLNIDQNPGTAPKYGIRGIPTLLLFKNGEVAATKVGALSKGQLKEFL  
DANLAGSAGSAGSAGSAGSAGSAGSAGSAGSAGS

**Blue:** Trx; **Yellow:** linker; **Green:** modified linker; **Pink:** sequence for modification; **White:** restriction enzyme site.

**Table S2 Percentage residual currents ( $I_{res\%}$ ) for the three levels of repeating feature A recorded during C-terminus first concatemer translocation.**

|                                     | Trx-linker dimer              | Trx-linker tetramer          | Trx-linker hexamer  | Trx-linker octamer            | Trx-linker octamer <sup>[c]</sup> | Trx-linker octamer <sup>[d]</sup> |
|-------------------------------------|-------------------------------|------------------------------|---------------------|-------------------------------|-----------------------------------|-----------------------------------|
| $I_{res\%}$ (A1) <sup>[a]</sup>     | 34 ± 1%                       | 35 ± 1%                      | 34 ± 1%             | 35 ± 1%                       | 26 ± 2%                           | 35 ± 1%<br>32 ± 1%                |
| $I_{res\%}$ (A2) <sup>[a]</sup>     | 22 ± 3%                       | 24 ± 2%                      | 23 ± 1%             | 23 ± 1%                       | 16 ± 1%                           | 24 ± 1%                           |
| $I_{res\%}$ (A3) <sup>[a],[b]</sup> | 1.9 ± 2.4%                    | 1.7 ± 1.7%                   | 2.2 ± 2.3%          | 2.3 ± 2.7%                    | 0.5 ± 1.7%                        | 2.0 ± 2.0%                        |
| $N^{[a],[b]}$<br>n                  | 105 units<br>2 separate pores | 66 units<br>3 separate pores | 122 units<br>1 pore | 443 units<br>2 separate pores | 65 units<br>3 separate pores      | 47 units<br>2 separate pores      |

**[a]**  $I_{res\%}$  was calculated for each step in individual features A as the remaining current as a percentage of the open pore current (e.g.,  $I_{res\%}(A1) = I_{A1}/I_{open} \times 100\%$ ). The standard deviations were derived for N Trx-linker units collected with 'n' separate pores. Conditions: 750 mM GdnHCl, 10 mM HEPES, pH 7.2, +140 mV (trans), 24 ± 1 °C. Concatemer concentrations (cis): dimer 2.23 μM, tetramer 0.63 μM, hexamer 0.25 μM, octamer 0.81 μM.

**[b]** Trx-linker units that produced a Level A3 with a dwell time <1 ms were discarded during analysis. The associated spikey appearance suggested under-sampling and therefore an inaccurate  $I_{res\%}$  value. Trx-linker units that generated a Level A3 with a dwell time >1 ms and a square shape were included in the  $I_{res\%}$  analysis.

**[c]** Conditions: 750 mM KCl, 10 mM HEPES, 0.81 μM octamer (cis), pH 7.2, +140 mV (trans), 24 ± 1 °C.

**[d]** Conditions: 750 mM GdnHCl, 10 mM HEPES, 0.81 μM octamer (trans), pH 7.2, -140 mV (trans), 24 ± 1 °C. A sub-conductance level was seen at Level A, which might be attributed to the folded thioredoxin unit adopting two conformations as a stopper under the electroosmotic force at the trans opening of the pore.

**Table S3 Frequency of C terminus-first or N terminus-first translocation events recorded with Trx-linker concatemers<sup>[a]</sup>.**

|          | Voltage (trans) | C terminus-first translocation | N terminus-first translocation | N   |
|----------|-----------------|--------------------------------|--------------------------------|-----|
| Dimer    | +140 mV         | 67%                            | 33%                            | 142 |
| Tetramer | +140 mV         | 68%                            | 32%                            | 87  |
| Hexamer  | +140 mV         | 68%                            | 32%                            | 196 |
| Octamer  | +120 mV         | 86%                            | 14%                            | 87  |
|          | +140 mV         | 91%                            | 9%                             | 373 |
|          | +160 mV         | 94%                            | 6%                             | 192 |
|          | +180 mV         | 85%                            | 15%                            | 62  |

**[a]** Conditions: 750 mM GdnHCl, 10 mM HEPES, pH 7.2, the applied potential (trans) is specified in the table,  $24 \pm 1$  °C. Concatemer concentrations (cis): dimer 2.23  $\mu$ M, tetramer 0.63  $\mu$ M, hexamer 0.25  $\mu$ M, octamer 0.81  $\mu$ M.

**Table S4 Percentages of concatemer translocation events with N numbers of feature A repeats<sup>[a]</sup>**

|                         | N   |     |     |     |    |    |    |     | Total events |
|-------------------------|-----|-----|-----|-----|----|----|----|-----|--------------|
|                         | 1   | 2   | 3   | 4   | 5  | 6  | 7  | 8   |              |
| Dimer <sup>[b]</sup>    | 44% | 56% | /   | /   | /  | /  | /  | /   | 73           |
| Tetramer <sup>[b]</sup> | 12% | 31% | 26% | 31% | /  | /  | /  | /   | 42           |
| Hexamer <sup>[b]</sup>  | 14% | 43% | 20% | 14% | 3% | 6% | /  | /   | 35           |
| Octamer <sup>[b]</sup>  | 10% | 16% | 22% | 19% | 3% | 9% | 9% | 12% | 86           |
| Octamer <sup>[c]</sup>  | 11% | 20% | 29% | 13% | 9% | 4% | 7% | 7%  | 45           |

**[a]** If the initial A3 level appeared as a spike to ~0 pA and was followed by at least one complete iteration of feature A, it was counted as one repeat.

**[b]** Conditions: 750 mM GdnHCl, 10 mM HEPES, pH 7.2, +140 mV (trans), 24 ± 1 °C. Concatemer concentrations (cis): dimer 2.23 μM, tetramer 0.63 μM, hexamer 0.25 μM, octamer 0.81 μM.

**[c]** Conditions: 750 mM KCl, 10 mM HEPES, pH 7.2, 0.81 μM octamer (cis), +140 mV (trans), 24 ± 1 °C.

**Table S5 Mean dwell times ( $\langle \tau \rangle$ ) derived by QuB<sup>[a]</sup> for the three levels of repeating feature A (A1, A2, A3) recorded during the C-terminus first translocation of Trx-linker octamers through a single (NN\_113R)<sub>7</sub> nanopore<sup>[b]</sup>**

| Voltage (trans)                         | +140 mV                         |                   |
|-----------------------------------------|---------------------------------|-------------------|
| $\langle \tau_{A1} \rangle / \text{ms}$ | $270 \pm 20$                    | N = 277           |
| $\langle \tau_{A2} \rangle / \text{ms}$ | $23 \pm 1$                      | N = 277           |
| $\langle \tau_{A3} \rangle / \text{ms}$ | $320 \pm 60$<br>$0.69 \pm 0.04$ | N = 40<br>N = 294 |

**[a]** Dwell time analysis was performed by using the maximum interval likelihood algorithm of QuB.

**[b]** Conditions: 750 mM GdnHCl, 10 mM HEPES, pH 7.2,  $24 \pm 1$  °C.



**Table S6 Percentage residual current ( $I_{res\%}$ ) and root-mean-square noise ( $I_{RMS}$ ) characteristics of individual modifications on Trx-linker nonamers.**

|                           | $\Delta I_{res\%}^{[a]}$ | $I_{RMS} / pA^{[c]}$ | <b>N</b>                           |
|---------------------------|--------------------------|----------------------|------------------------------------|
| <b>Trx-linker-14S-P</b>   | $4.4 \pm 0.8\%$          | $0.96 \pm 0.18$      | 19 concatemers<br>4 separate pores |
|                           | $4.0 \pm 1.2\%^{[b]}$    | $1.6 \pm 0.9^{[b]}$  | 19 concatemers<br>4 separate pores |
| <b>Trx-linker-24S-P</b>   | $8.3 \pm 1.6\%$          | $2.0 \pm 0.6$        | 27 concatemers<br>3 separate pores |
|                           | $9.2 \pm 2.1\%^{[b]}$    | $2.5 \pm 0.9^{[b]}$  | 23 concatemers<br>3 separate pores |
| <b>Trx-linker-16C-GSH</b> | $5.1 \pm 0.9\%$          | $0.93 \pm 0.19$      | 46 concatemers<br>4 separate pores |
| <b>Trx-linker-26C-GSH</b> | $8.6 \pm 1.3\%$          | $1.6 \pm 0.2$        | 21 concatemers<br>3 separate pores |
| <b>Trx-linker-16C-SLN</b> | $15 \pm 1\%$             | $0.73 \pm 0.28$      | 24 concatemers<br>3 separate pores |
| <b>Trx-linker-26C-SLN</b> | $17 \pm 2\%$             | $1.7 \pm 0.5$        | 55 concatemers<br>5 separate pores |

**[a]**  $\Delta I_{res\%} = \langle I_{res\%}(A1, \text{Trx-linker}) \rangle - I_{res\%}(A1, \text{Trx-linker+PTM})$ . For a C terminus-first translocation event,  $\langle I_{res\%}(A1, \text{Trx-linker}) \rangle$  was determined as the mean  $I_{res\%}$  value of the unmodified A1 levels within an individual translocation event.  $I_{res\%}(A1, \text{Trx-linker+PTM})$  was determined for the A1 level of the modified linker and appeared once per translocating concatamer. Conditions: 375 mM GdnHCl, 375 mM KCl, 10 mM HEPES, pH 7.2, +140 mV (trans),  $24 \pm 1$  °C.

**[b]** Conditions: 750 mM GdnHCl, 10 mM HEPES, pH 7.2, +140 mV (trans),  $24 \pm 1$  °C.

**[c]** Root-mean-square noise values ( $I_{RMS}$ ) were measured from current traces after an applied post-recording filter at 2 kHz.  $I_{RMS}$  was normalised by the noise of each pore ( $I_{RMS}^2 = I_{RMS}(A1, \text{Trx-linker+PTM})^2 - I_{RMS}(\text{open pore})^2$ ).

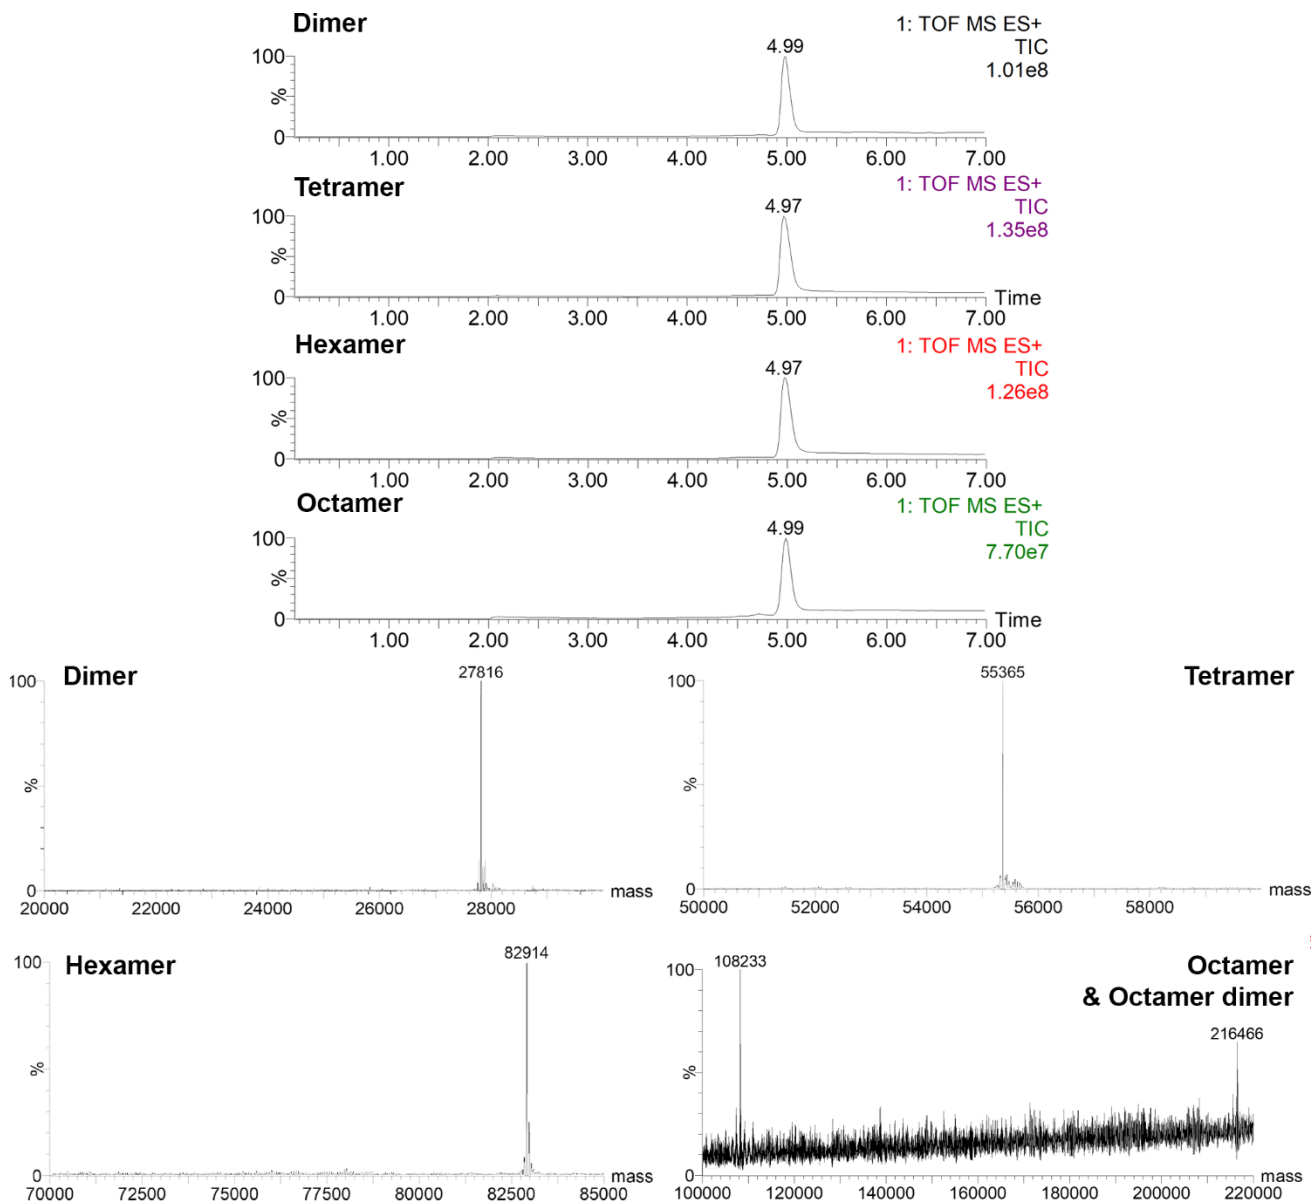

**Fig. S1 LC-MS characterization of Trx-linker concatemers.** LC-MS chromatograms (top) and deconvoluted ESI-MS spectra (bottom) are shown. Dimer,  $(\text{Trx-linker})_2$ : mass = 27816 Da (calc) and 27816 Da (obs); Tetramer,  $(\text{Trx-linker})_4$ : mass = 55367 Da (calc) and 55365 Da (obs); Hexamer,  $(\text{Trx-linker})_6$ : mass = 82918 Da (calc) and 82914 Da (obs); Octamer,  $(\text{Trx-linker})_7\text{Trx}$ : mass = 108231 Da (calc) and 108233 Da (obs); Dimer of octamers: mass = 216460 (calc) and 216466 Da (obs).

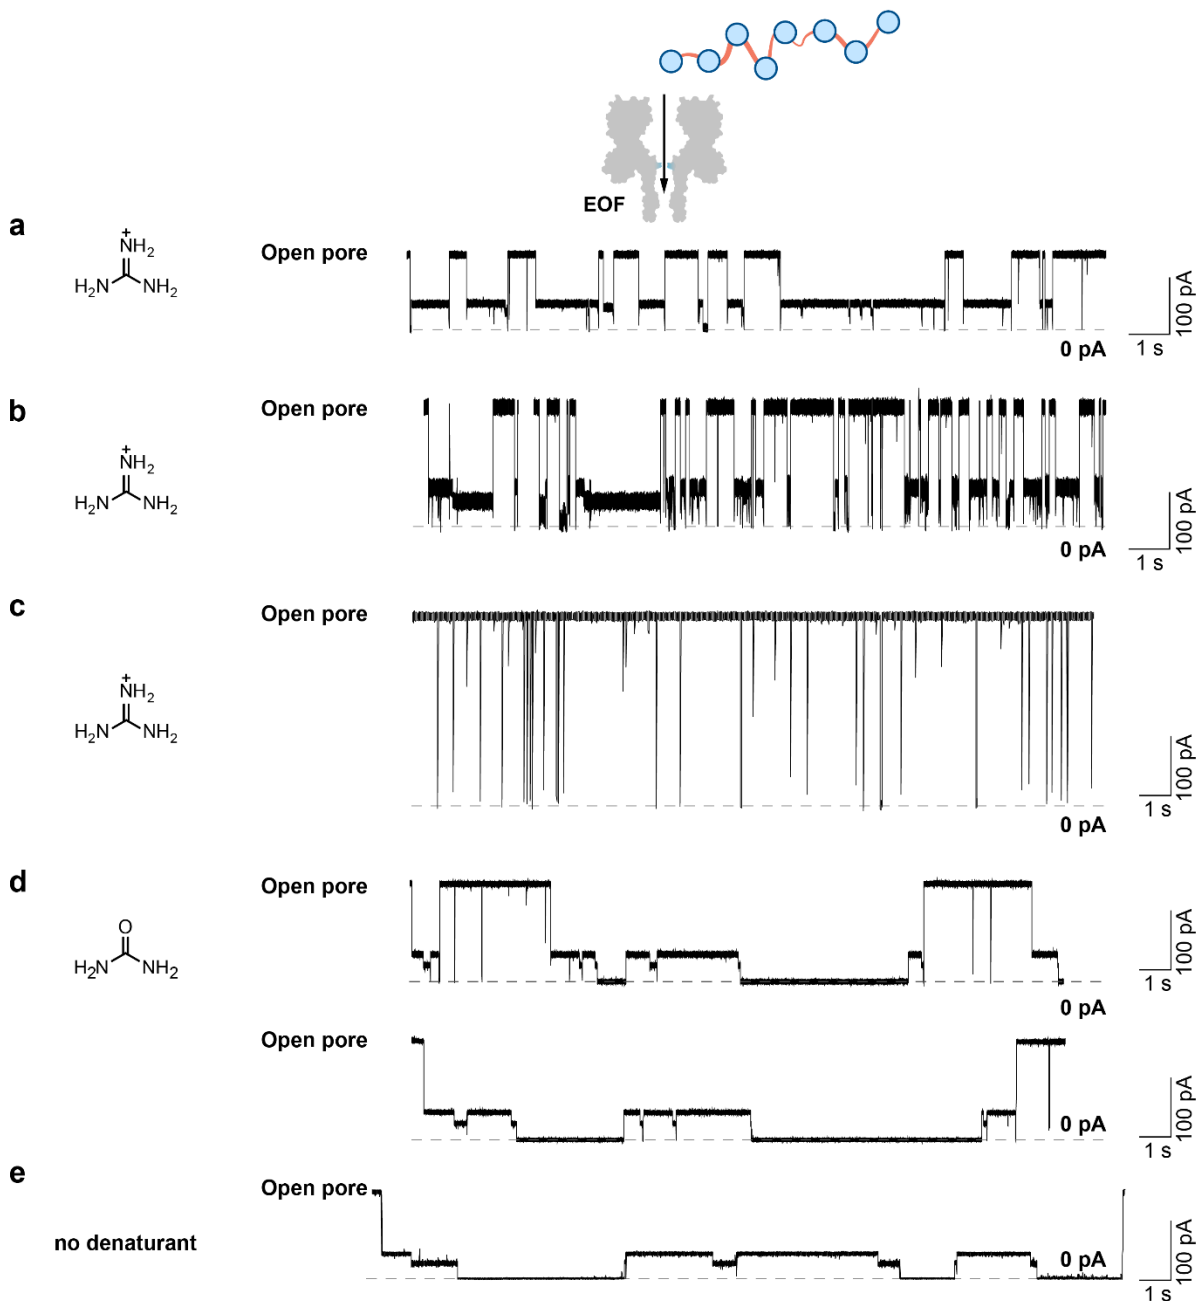

**Fig. S2 Electroosmosis-driven translocation of Trx-linker octamers through a nanopore. a-e,** Current traces for the translocation of Trx-linker octamers through a charge-selective nanopore ((NN-113R)<sub>7</sub>) in the presence of 750 mM GdnHCl **(a)**, 1.5 M GdnHCl **(b)**, 3 M GdnHCl **(c)** without post-acquisition filtering, 2 M urea **(d)** or no denaturant **(e)** with 2 kHz post-acquisition filtering. Current features for subunit-by-subunit translocation were lost at 3 M GdnHCl **(c)**. The mean number of features A recorded per concatamer is **(a)** ~4, **(b)** ~3, **(c)** 0, **(d)** ~4, and **(e)** ~4. Conditions: 10 mM HEPES, pH 7.2, 0.81  $\mu$ M Trx-linker octamer (cis), +140 mV (trans), 24  $\pm$  1  $^{\circ}$ C, with **(a)** 750 mM GdnHCl; **(b)** 1.5 M GdnHCl; **(c)** 3 M GdnHCl; **(d)** 2 M urea and 750 mM KCl; **(e)** 750 mM KCl.

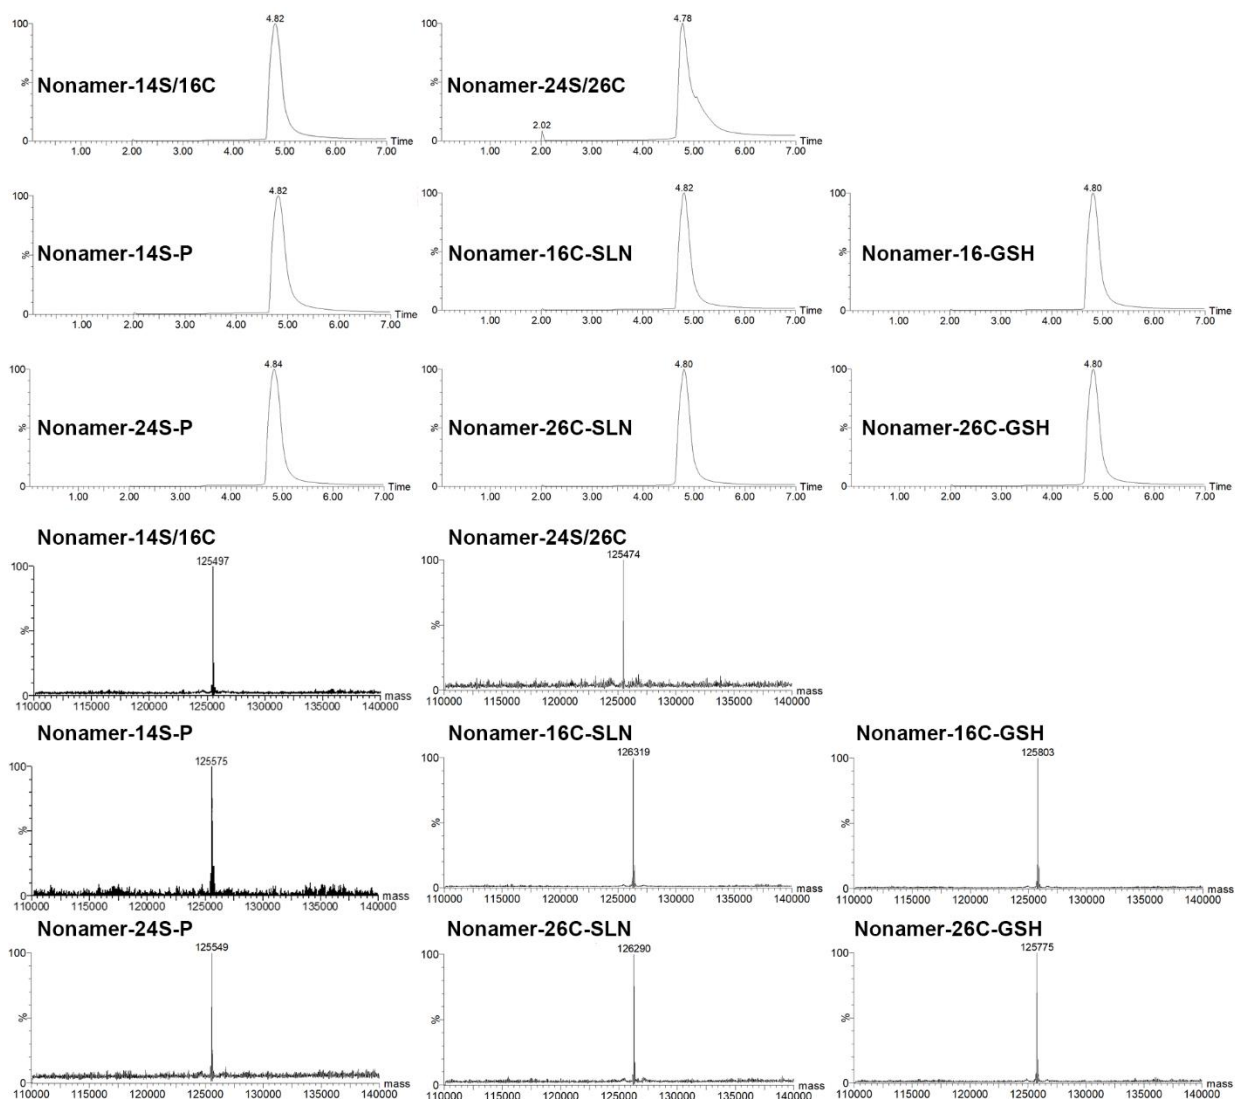

**Fig. S3 LC-MS characterization of Trx-linker nonamers.** LC-MS chromatograms (top) and deconvoluted ESI-MS spectra (bottom). Nonamer 14S/16C: mass = 125498 Da (calc) and 125497 Da (obs); Nonamer 24S/26C: mass = 125470 Da (calc) and 125474 Da (obs); Nonamer 14S-P: mass = 125578 Da (calc) and 125575 Da (obs); Nonamer 16C-SLN: mass = 126319 Da (calc) and 126319 Da (obs); Nonamer 16C-GSH: mass = 125803 (calc) and 125803 Da (obs); Nonamer 24S-P: mass = 125550 Da (calc) and 125549 Da (obs); Nonamer 26C-SLN: mass = 126291 Da (calc) and 126290 Da (obs); Nonamer 26C-GSH: mass = 125775 (calc) and 125775 Da (obs).

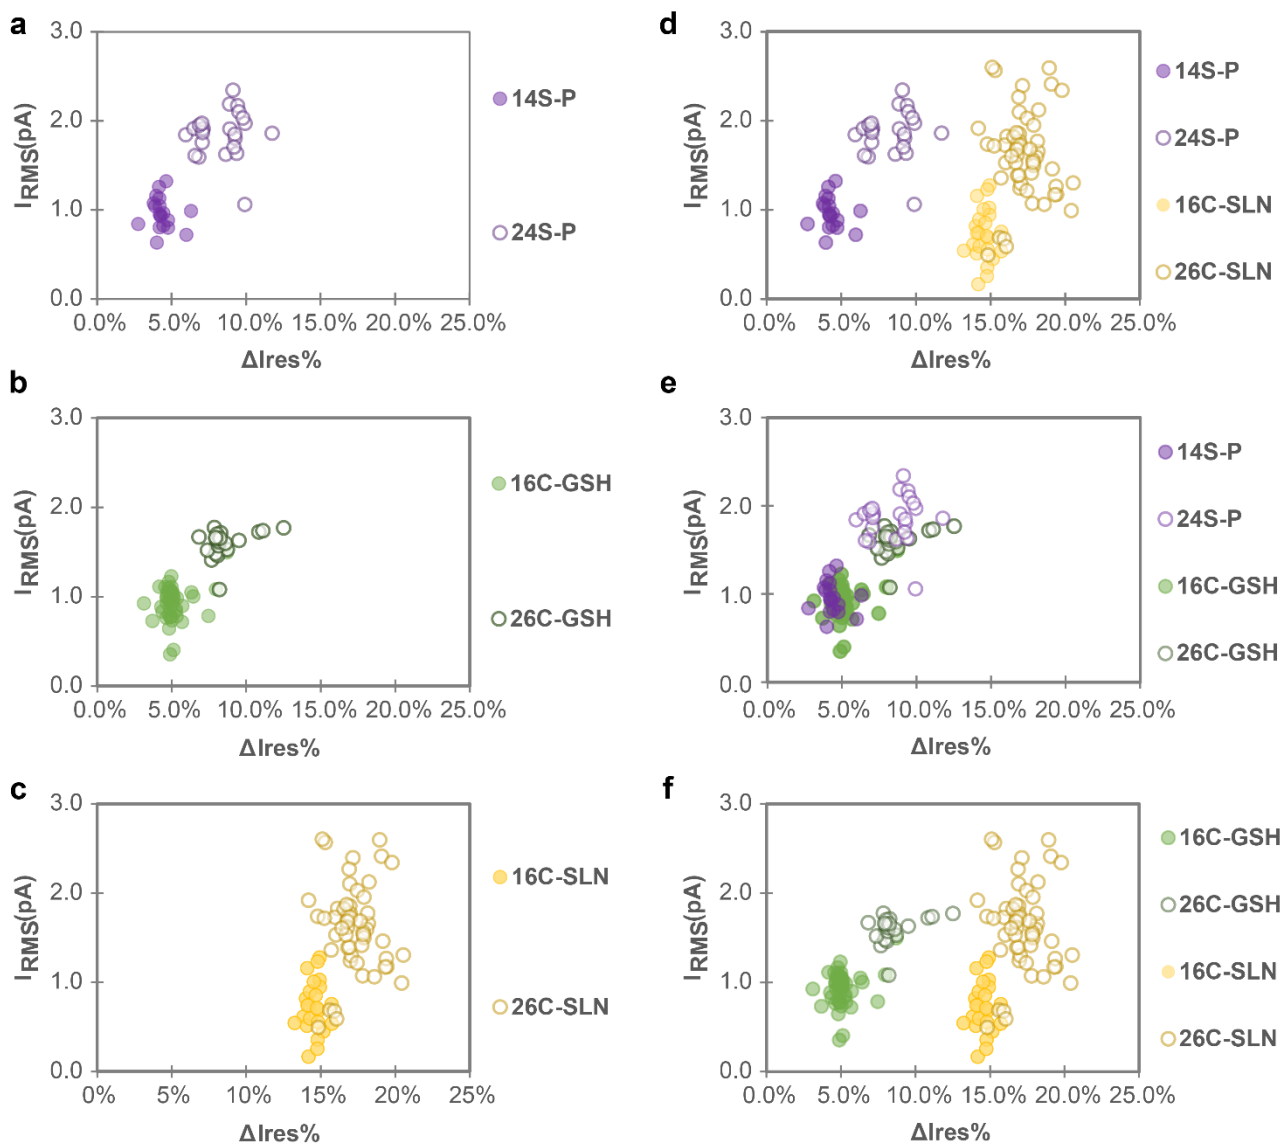

**Fig. S4 Identification and positional discrimination of PTMs in protein concatemers translocated by electroosmotic flow through a nanopore.** Protein nonamers containing a single PTM (See Fig. 3 for protein sequences and PTM structures) were tested. **a-c**, Scatter plots of  $I_{\text{RMS}}$  and  $\Delta I_{\text{res}}\%$  showing positional discrimination of a phosphorylated serine, a glutathionylated cysteine, or a glycosylated cysteine at sites 10 aa apart ( $\Delta I_{\text{res}}\% = \langle I_{\text{res}}\%(A1, \text{Trx-linker}) \rangle - I_{\text{res}}\%(A1, \text{Trx-linker} + \text{PTM})$ , where  $\langle I_{\text{res}}\%(A1, \text{Trx-linker}) \rangle$  is the mean  $I_{\text{res}}\%$  value of A1 levels of an unmodified unit within a single translocation event. Conditions: 375 mM GdnHCl, 375 mM KCl, 10 mM HEPES, pH 7.2, 1.2  $\mu\text{M}$  Trx-linker nonamer (cis), +140 mV (trans),  $24 \pm 1$  °C. **d-f**, Overlaid scatter plots of  $I_{\text{RMS}}$  and  $\Delta I_{\text{res}}\%$  showing discrimination between phosphorylated and glycosylated populations, glutathionylated and glycosylated populations, and overlaps between phosphorylated and glutathionylated populations.

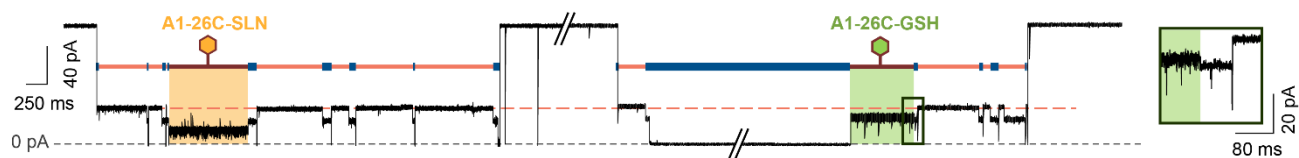

**Fig. S5 Identification of PTMs in a mixture of two concatemers.** Current traces recorded with the same nanopore for three C terminus-first translocations of a mixture of two Trx-linker nonamers containing either a GSH or SLN modification at position 26C within the central linker. The A1 level for the unmodified units (orange dash), and the A1 level for a unit modified with 26C-GSH (A1-26C-GSH, green) or 26-SLN (A1-26C-SLN, yellow) are colour-coded. The inset zooms in on the transition from A1-26C-GSH to A2. Traces have been filtered at 2 kHz. Conditions: 375 mM GdnHCl, 375 mM KCl, 10 mM HEPES, pH 7.2, 1.2  $\mu$ M Trx-linker nonamer (cis), +140 mV (trans),  $24 \pm 1$   $^{\circ}$ C.

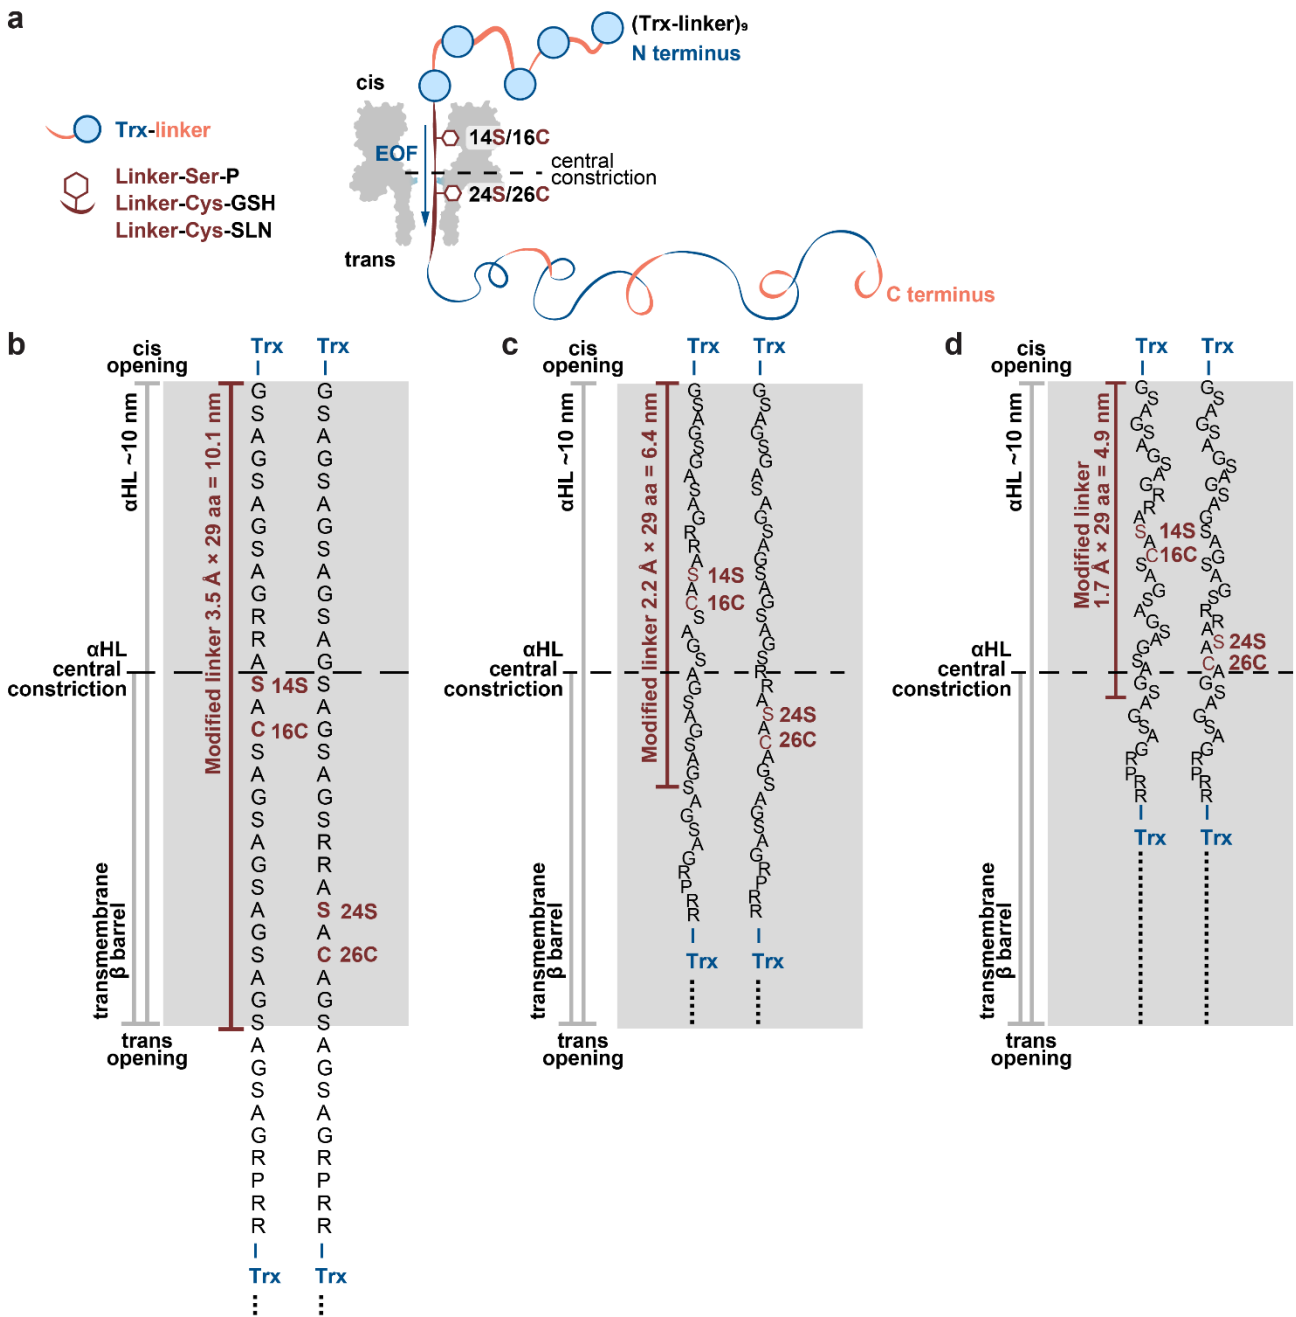

**Fig. S6 Positions of modification sites during translocation through an  $\alpha$ HL pore.** **a**, The Trx-linker nonamers contained a RRASAC sequence within the central linker, which was post-translationally modified (hexagon). In a C-terminus-first threading configuration, as shown, the 14S/16C modification sites would be located closer to the cis opening of the  $\alpha$ HL pore than the 24S/26C pair, when translocation is paused with a Trx unit at the cis mouth of the pore. **b-d**, Depending on the degree of extension of the polypeptide chain under the EOF (3.5 Å per aa when fully extended, 1.7-2.2 Å per aa under  $\sim 5$ -10 pN<sup>1</sup>), the 14S/16C and 24S/26C sites would be located at different positions within an  $\alpha$ HL pore. Assuming that the N-terminal residue of the linker is at the cis opening of the pore when the translocation is arrested by a folded Trx unit, the modified linker (red) might fully span the  $\alpha$ HL pore (**b**) or occupy only a part of the nanopore (**c,d**). When the 24S/26C sites are located nearer the central constriction of the  $\alpha$ HL pore (**c,d**), a PTM at 24S/26C would produce a larger current blockade than that at 14S/16C (PTM = Ser-P, Cys-GSH, Cys-SLN), which is what is observed (Fig. 3b). Given that the applied potential drops mostly across the transmembrane  $\beta$  barrel<sup>2</sup>, the current difference between 14S/16C+PTM and 24S/26C+PTM is likely to be larger in **c** than in **d**.

## References

1. Winardhi, R. S., Tang, Q., Chen, J., Yao, M. & Yan, J. Probing small molecule binding to unfolded polyprotein based on its elasticity and refolding. *Biophys. J.* **111**, 2349–2357 (2016).
2. Howorka, S. & Bayley, H. Probing distance and electrical potential within a protein pore with tethered DNA. *Biophys. J.* **83**, 3202–3210 (2002).
